# Supplementary material
Source: publisher figshare collection journal article supplement (https://karger.figshare.com/ndownloader/files/30609087)
Supplement: Supplementary file 1 [file 30609087]

**List of Supplementary Files**

**Table S1.** Biomarkers values at initial consultation according to the final AKI etiology

**Table S2**. Impact of the C-reactive protein to identify pre-renal AKI episodes that have been misclassified based on NGAL levels

**Table S3**. Biomarkers values at the time of diagnosis according to maximum AKI stage achieved

**Fig. S1.** Correlation of the pNGAL levels (ng/mL) and serum C-reactive protein (mg/L)
